# Supplementary material for: Btk SH2-kinase interface is critical for allosteric kinase activation and its targeting inhibits B-cell neoplasms
Source: PubMed Central journal article supplement (PMC7210950; doi:10.1038/s41467-020-16128-5), 2020-05-08
Supplement: 41467_2020_16128_MOESM1_ESM.pdf [file 41467_2020_16128_MOESM1_ESM.pdf]

## **SUPPLEMENTARY INFORMATION**

Btk SH2-kinase interface is critical for allosteric kinase activation and its targeting inhibits B-cell neoplasms

Duarte et al.

Contents

Supplementary Figures 1-7

Supplementary Tables 1-5

# SUPPLEMENTARY FIGURES 1-7

## Supplementary Figure 1

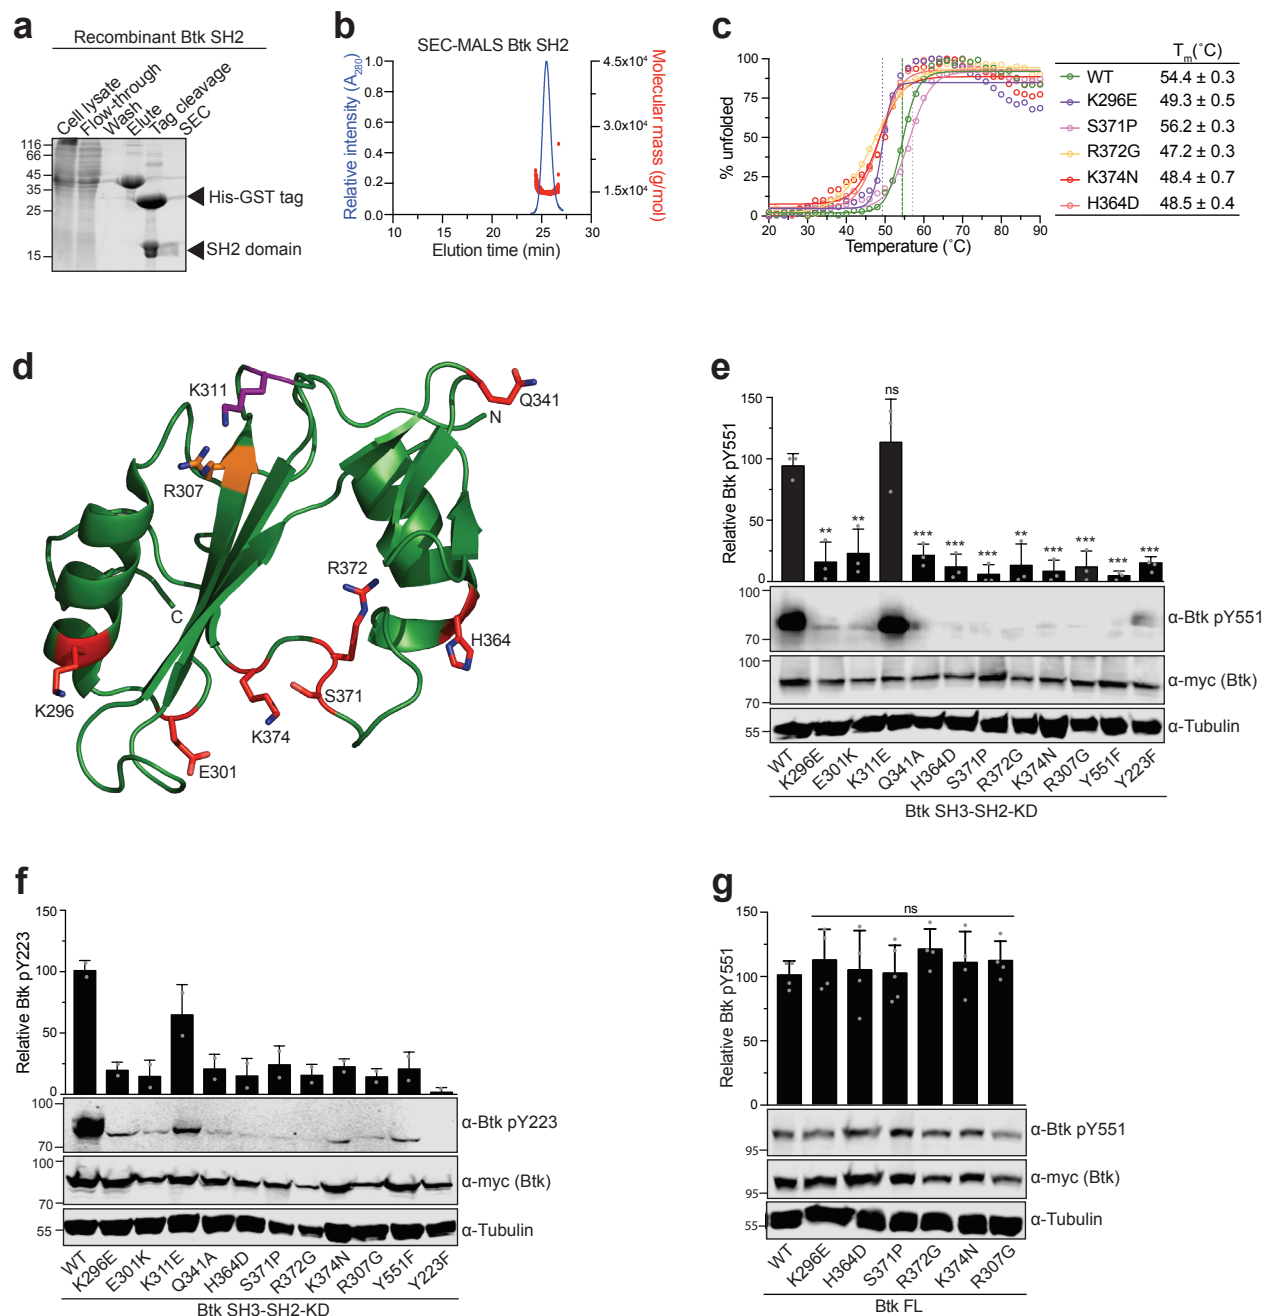

### Supplementary Figure 1, related to Figure 1. Effect of XLA mutations *in vitro* and in HEK cells.

(a) Representative SDS-PAGE analysis of purification steps for recombinant Btk SH2 wild-type from *E. coli*. TEV cleavage was used for removal of 6xHis-GST tag used for purification. All Btk SH2 mutants were purified using an identical protocol.

(b) Representative SEC-MALS analysis of purified Btk SH2 domain wild-type (monomer = 13.2 kDa). All proteins were analyzed by SEC-MALS and found in the homogenous state in solution (data not shown).

(c) Thermal shift assay (TSA) of recombinant Btk SH2 domains. Melting temperature (T<sub>m</sub>) for wild-type Btk was calculated from two independent measurements.

(d) Mapping of a subset of XLA-patient mutations (red sticks) onto the human Btk SH2 structure (PDB 2GE9). The residue R307 (orange sticks) is part of the pY-binding motif (FIVRD). The residue K311 is a non-XLA control mutation facing the opposite surface of the SH2 domain. N- and C-terminal are indicated as N and C, respectively.

(e,f,g) HEK293 cells were transiently transfected with indicated Btk constructs containing an N-terminal 6xMyc tag. Immunoblotting of total cell lysates was performed to assess Btk phosphorylation on sites Y551 and pY223, and relative phosphorylation normalized to total Btk (Myc-Btk) expression. Tubulin was used as loading control. Data shown in (e) and (g) are the mean ± SD of three biological replicates (n=3), while data shown in (f) is the mean ± SD of two technical replicates (n=2). P-values were calculated against the wild-type (WT) using an unpaired *t*-test. \*\*P ≤ 0.01, \*\*\*P ≤ 0.001, and non-significant (ns). Source data are provided as a Source Data file.

## Supplementary Figure 2

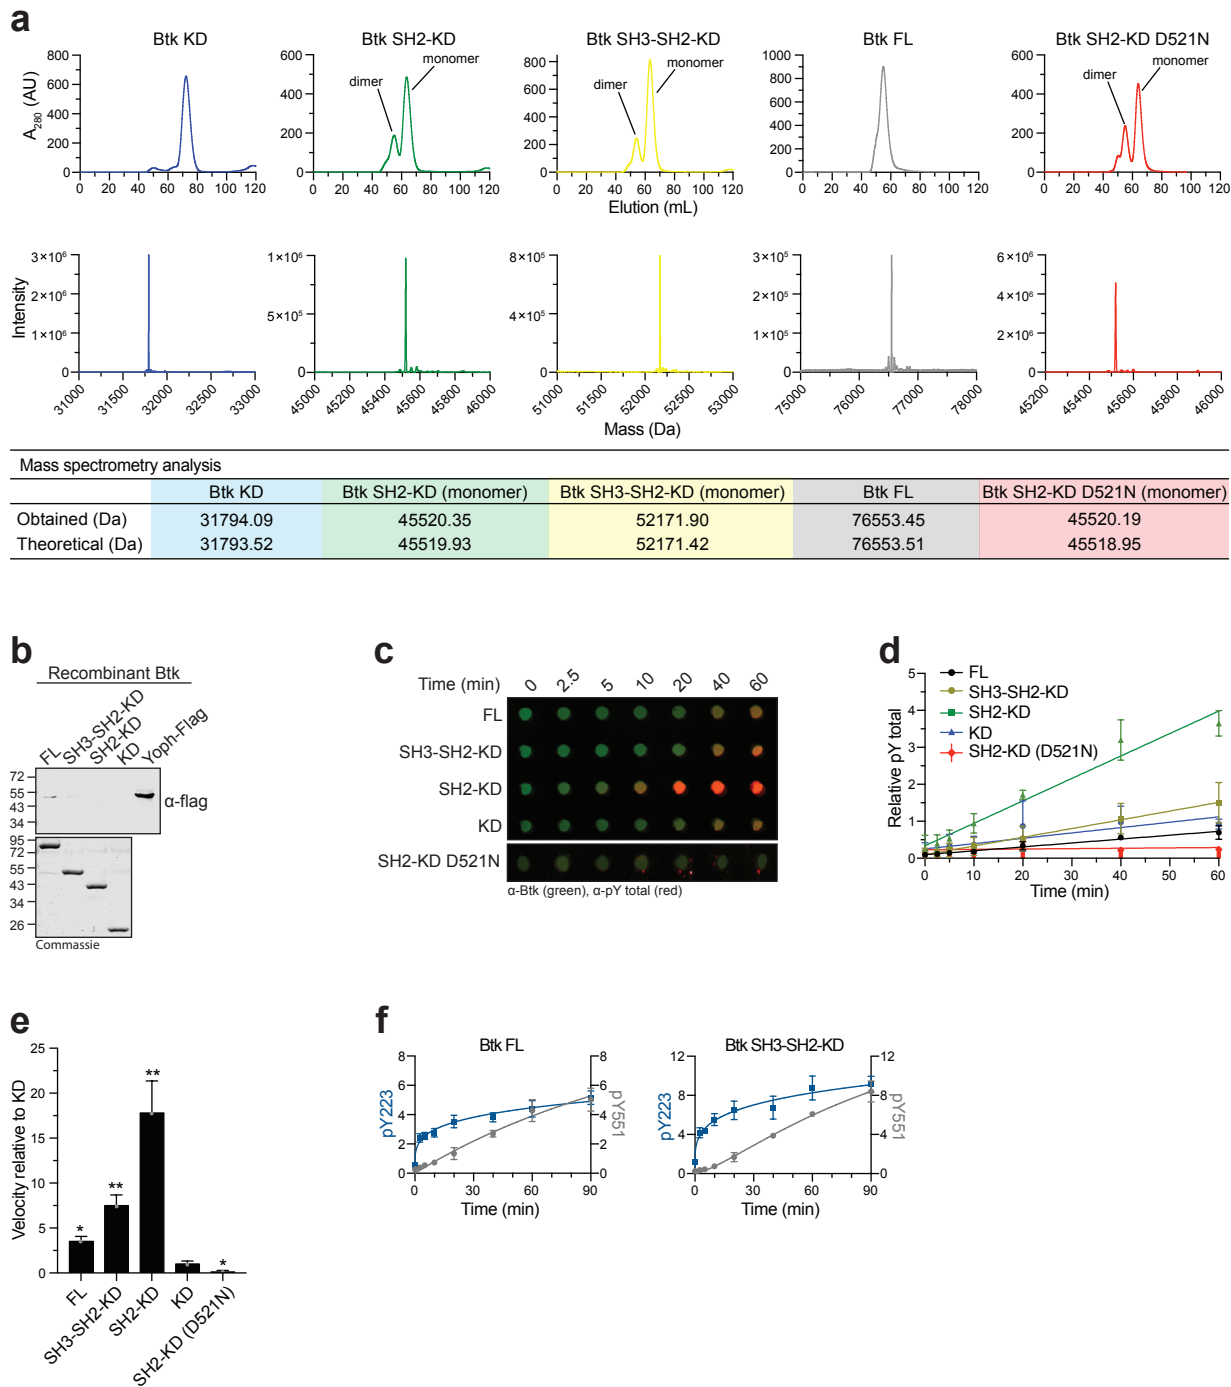

### Supplementary Figure 2, related to Figure 2. Purification of recombinant Btk and autophosphorylation *in vitro*.

(a) SEC of recombinant Btk expressed and purified from Sf9 cells (top). Only monomeric peaks were used for the described assays. All samples were subjected to MS analysis for confirmation of protein identity and unphosphorylated state (> 95% for all samples, bottom). The table summarizes the theoretical and obtained molecular weight for the indicated proteins.

(b) Representative immunoblot to confirm the absence of recombinant Yoph-flag phosphatase from proteins purified in Sf9 cells (top) and corresponding SDS-PAGE of recombinant untagged Btk proteins (bottom).

(c, d, e) Btk autophosphorylation *in vitro* assay performed as described in methods. The levels of total phosphotyrosine and total Btk were assessed using immunoblot in a dot-blot apparatus, relative autophosphorylation kinetics plotted overtime and normalized to total Btk protein, and relative autophosphorylation velocities calculated from the linear fitting. Data are the mean  $\pm$  SD of two independent experiments (n=3). P-values relative to Btk KD were calculated using unpaired *t*-test. \*P  $\leq$  0.05 and \*\*P  $\leq$  0.01.

(f) Autophosphorylation kinetics of Y223/Y551 *in vitro* assessed as described above. Data shown are the mean  $\pm$  SD of two independent experiments done in duplicates (n=2).

Source data are provided as a Source Data file.

## Supplementary Figure 3

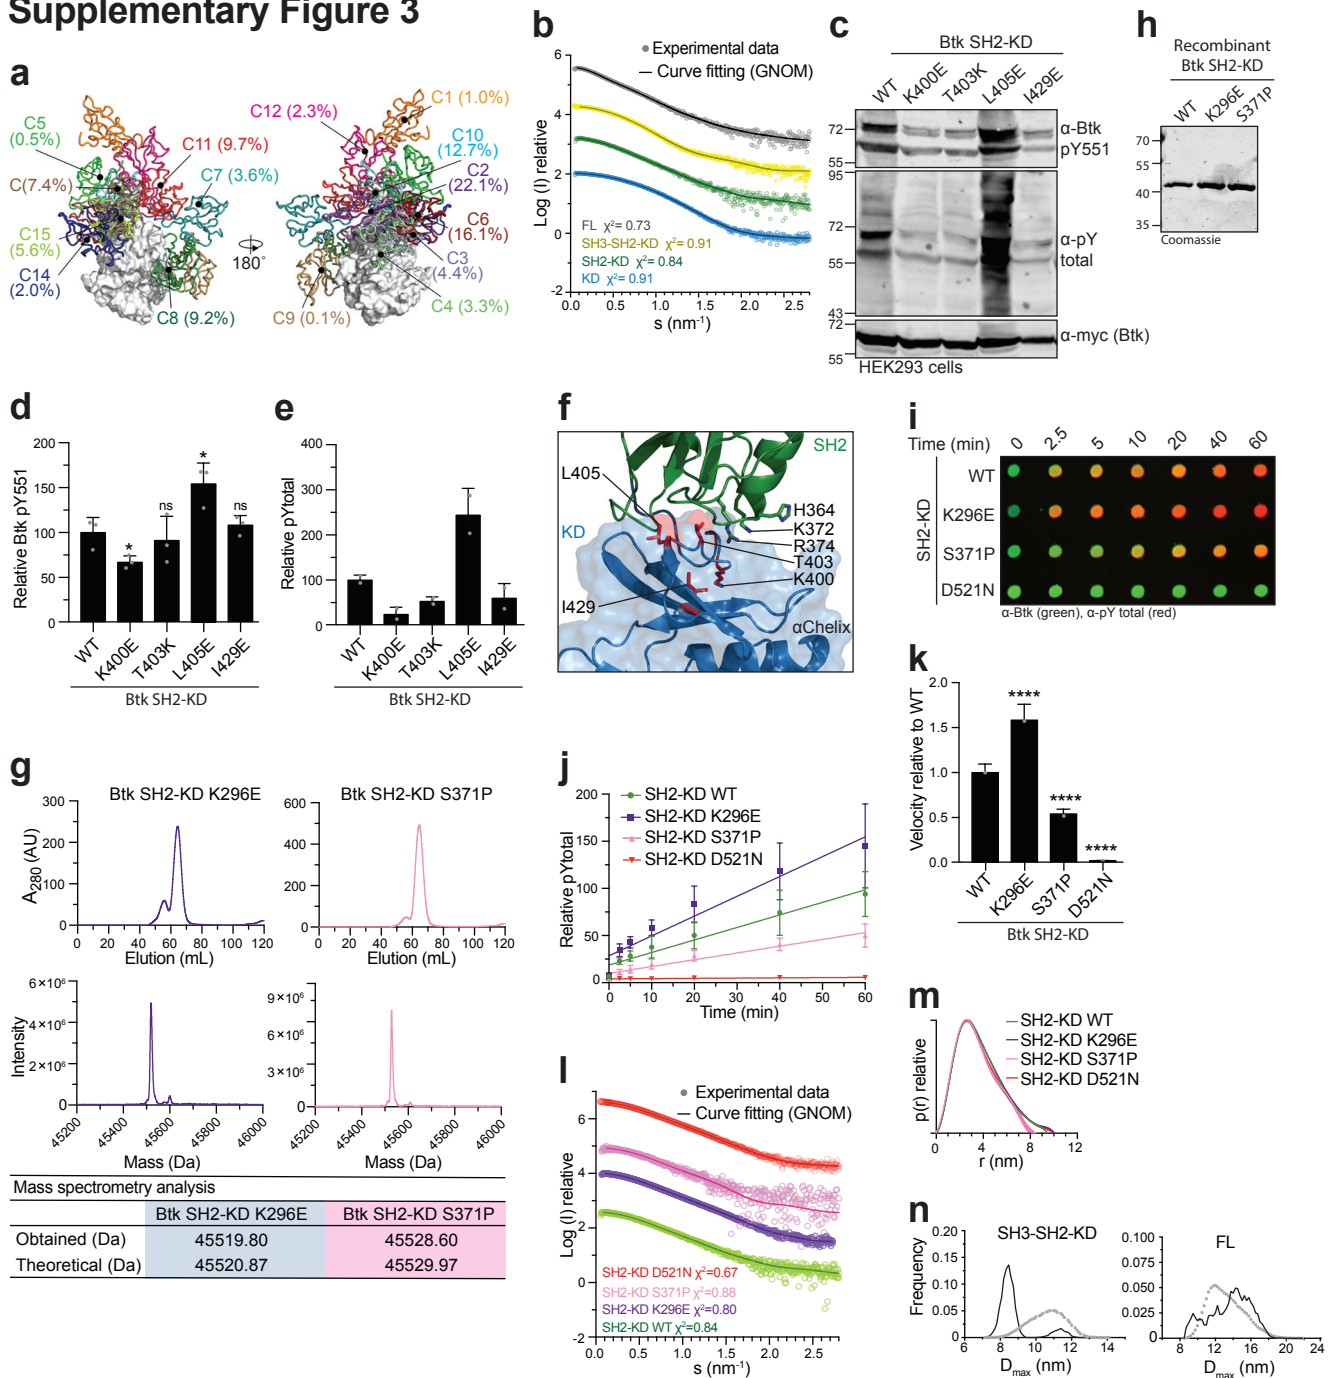

### Supplementary Figure 3, related to Figure 3 and 4. MD and SAXS analysis of Btk wild-type and mutants.

(a) MD simulation for the SH2-KD complex. Obtained clusters of the SH2 positions (several colors) relative to the KD (white).

(b) Experimental SAXS data of recombinant wild-type Btk proteins. The indicated  $\chi^2$  represents the GNOM fitting (line) against the experimental data (dots) for each construct. See Supplementary Table 2 for details. Raw data is available at SASDB.

(c,d,e) HEK293 cells were transiently transfected with indicated Btk constructs containing an N-terminal 6xmyc tag. Immunoblotting of total cell lysates was performed to assess Btk phosphorylation on Y551 and pY total, and relative phosphorylation normalized to total Btk (Myc-Btk) expression. Tubulin was used as loading control. Data shown in (d) and (e) are the mean  $\pm$  SD of three ( $n=3$ ) and two technical ( $n=2$ ) replicates, respectively. P-values relative to Btk WT were calculated using an unpaired  $t$ -test.

(f) Residues mutated are shown as red sticks in a representative Btk SH2-KD structure obtained in the MD simulation (C15).

(g) SEC of recombinant mutant Btk purified from Sf9 cells (top). All samples were subjected to MS analysis for confirmation of protein identity and unphosphorylated state (>95% for all samples, bottom).

(h) Representative SDS-PAGE analysis of recombinant untagged Btk SH2-KD mutant proteins purified from Sf9 cells.

(i,j,k) *In vitro* autophosphorylation of Btk SH2-KD mutants performed as described in methods. The levels of total phosphotyrosine and total Btk were assessed using immunoblot in a dot-blot apparatus, relative autophosphorylation kinetics plotted overtime and normalized to total Btk protein, and relative autophosphorylation velocities obtained from linear fit. Data are the mean  $\pm$  SD of two independent experiments ( $n=6$ ). P-values relative to Btk wild-type (WT) were calculated using unpaired  $t$ -test. \* $P \leq 0.05$ , \*\* $P \leq 0.01$ , \*\*\* $P \leq 0.001$ , \*\*\*\* $P \leq 0.0001$ , and non-significant (ns).

(l,m) Experimental SEC-SAXS data and  $D_{max}$  of mutant Btk proteins as indicated in (b). See Supplementary Table 2 for details.

(n) Flexibility analysis (EOM 2.0) of Btk WT showing the  $D_{max}$  of selected conformers (lines) from a representative pool of theoretical conformations (dot line).

Source data are provided as a Source Data file.

## Supplementary Figure 4

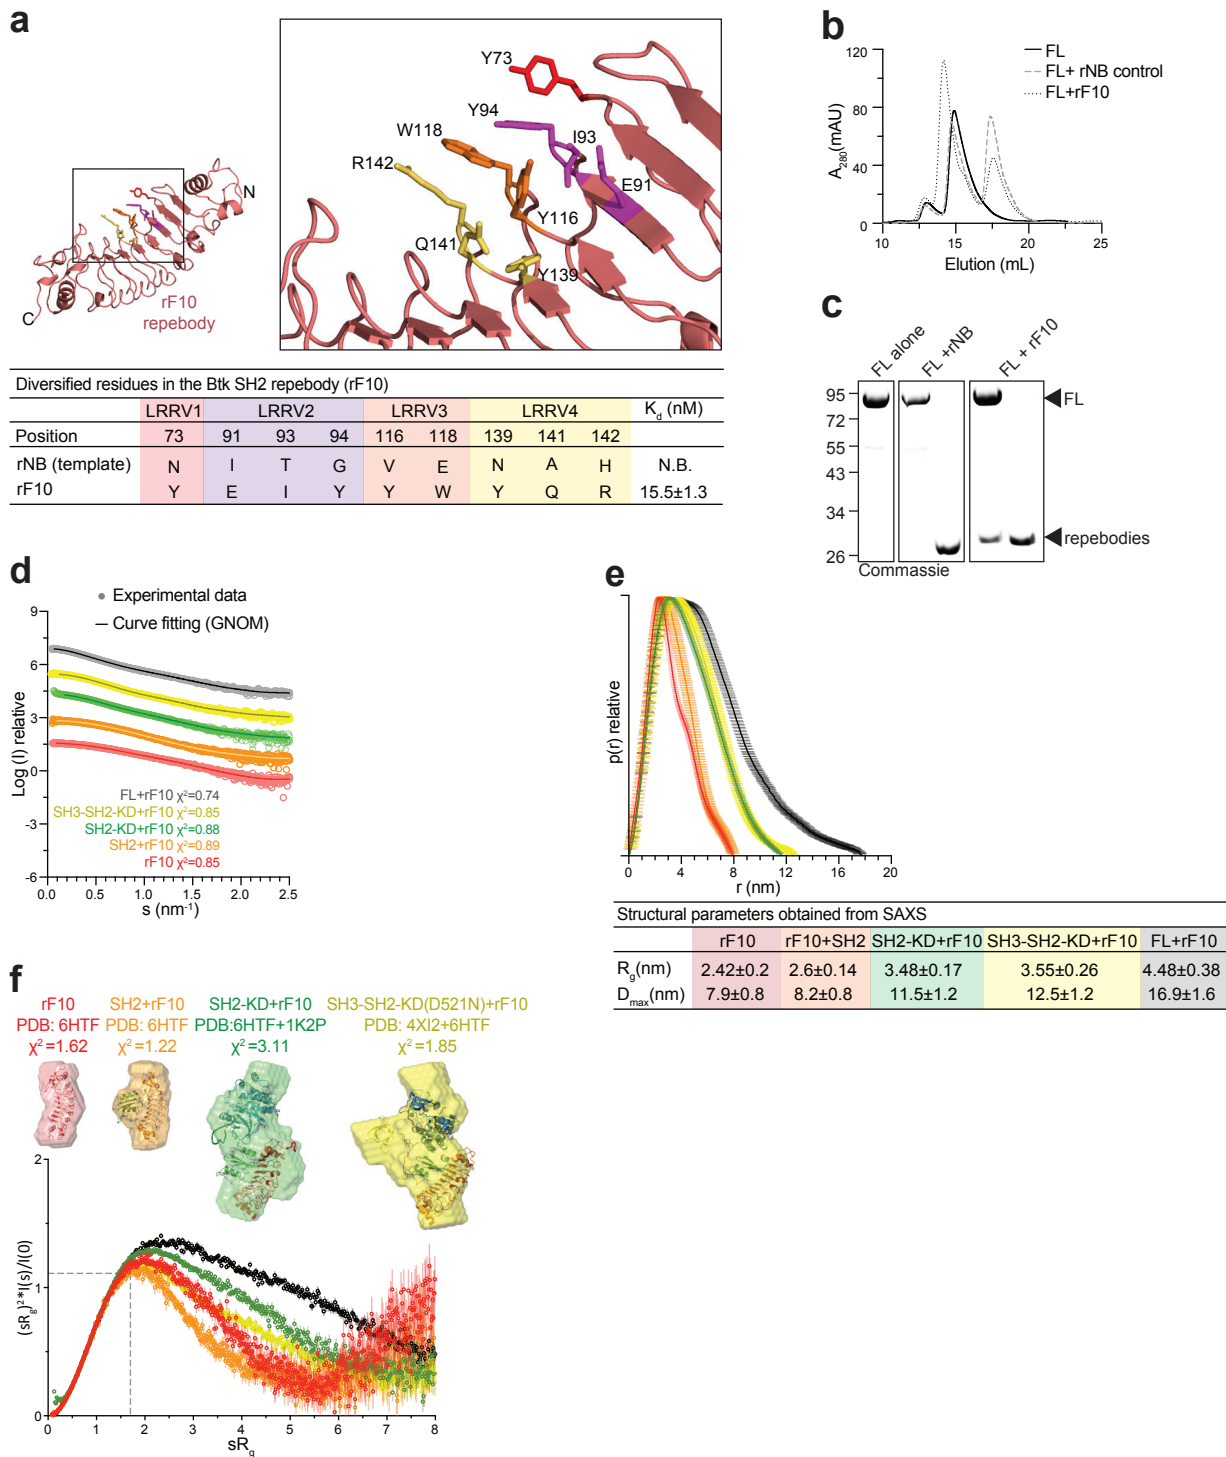

### Supplementary Figure 4, related to Figure 5. rF10 rebody development and SAXS analysis of Btk-rF10 complexes.

(a) The rF10 rebody (cartoon representation, salmon) was developed by randomizing variable sites within leucine-rich repeats (LRRV) using phage display and modular evolution approach. The residues from the LRRV1 (red), LRRV2 (magenta), LRRV3 (orange) and LRRV4 (yellow) mediating the binding to Btk SH2 domain are indicated as sticks. The table shows the amino acid sequence and binding affinity to the human Btk SH2 domain. Non-binding (N.B.).

(b) Size-exclusion chromatogram (SEC) analysis of full-length Btk alone and mixed with rF10 or rNB control. The FL+rF10 forms a stable 1:1 complex which shifts to the left.

(c) Peaks isolated from the SEC analysis shown in (b) resolved by SDS-PAGE and stained with Coomassie.

(d,e) Experimental SEC-SAXS data and  $D_{max}$  for rF10 alone and rF10-Btk complexes. The indicated  $\chi^2$  represents the GNOM fitting (line) against the experimental data (dots) for each respective sample. The table summarizes the particle dimensions ( $R_g$  and  $D_{max}$ ) and the  $\pm$  error for the indicated constructs. See Supplementary Table 4 for details.

(f) Dimensionless Kratky plot of rF10 alone and rF10-Btk complexes. *Ab initio* reconstructions obtained from SAXS (surface representation) were superimposed to the indicated crystal/MD structures. For the rF10-SH2-KD and rF10-SH3-SH2-KD complexes, rigid body modeling using SASREF was applied to obtain the final models displayed. Source data are provided as a Source Data file.

## Supplementary Figure 5

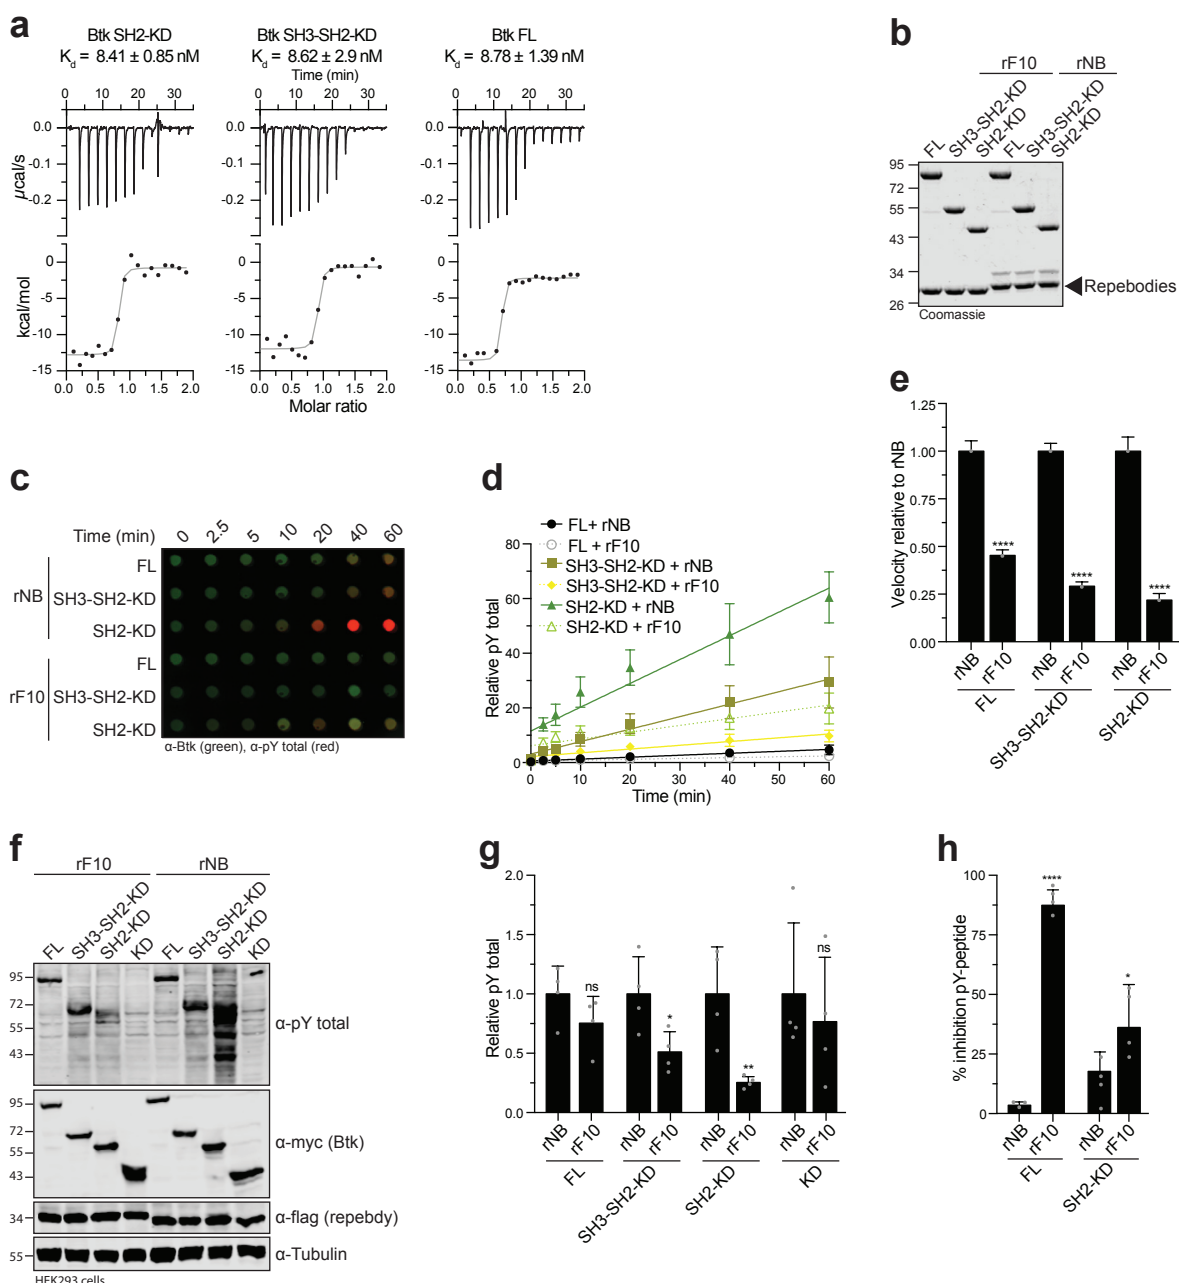

### Supplementary Figure 5, related to Figure 6. Functional characterization of the rF10 reobody.

(a) ITC measurement of rF10 reobody to different Btk constructs containing the SH2 domain (SH2-KD, SH3-SH2-KD and FL proteins). Top panels show the raw signal from a representative measurement, and bottom panels show the integrated calorimetric data of the area of each peak. The continuous line indicates the best fit to the experimental data assuming a 1:1 binding model. The  $K_d$  ( $\pm$  SD) value was calculated from two independent measurements.

(b) Representative SDS-PAGE analysis of recombinant Btk proteins mixed with rF10 and rNB control reebodies and used for autophosphorylation inhibition *in vitro*.

(c,d,e) *In vitro* autophosphorylation assay for Btk proteins in the presence of indicated reebodies was performed as described in methods. The levels of total phosphotyrosine and total Btk were assessed using immunoblot in a dot-blot apparatus. Relative autophosphorylation kinetics in the presence of rF10 (dashed lines) or rNB (continuous lines) reebodies plotted overtime and normalized to total Btk protein, and relative autophosphorylation velocities relative to each control reobody. Data are the mean  $\pm$  SD of three independent experiments ( $n=4$ ). P-values relative to each control rNB reobody were calculated using an unpaired *t*-test.

(f,g) HEK293 cells were transiently co-transfected with indicated Btk constructs and reebodies. Immunoblot was used to assess total phosphotyrosine phosphorylation. Quantification of total phosphotyrosine normalized to total Btk (Myc-Btk) expression level and relative to control reobody. Data shown are the mean  $\pm$  SD of three biological replicates ( $n=4$ ), and P-values were calculated relative to each rNB control using an unpaired *t*-test.

(h) Btk kinase activity against a PLC $\gamma$ 2 peptide (ERDINSL<sub>753</sub>YDVSR) in the presence of rF10 or control reobody. Reported inhibition (% of inhibition of peptide phosphorylation) from two independent experiments done in duplicates ( $n=4$ ). P-values were calculated relative to each rNB control using an unpaired *t*-test. \* $P \leq 0.05$ , \*\* $P \leq 0.01$ , \*\*\* $P \leq 0.001$  and non-significant (ns).

Source data are provided as a Source Data file.

## Supplementary Figure 6

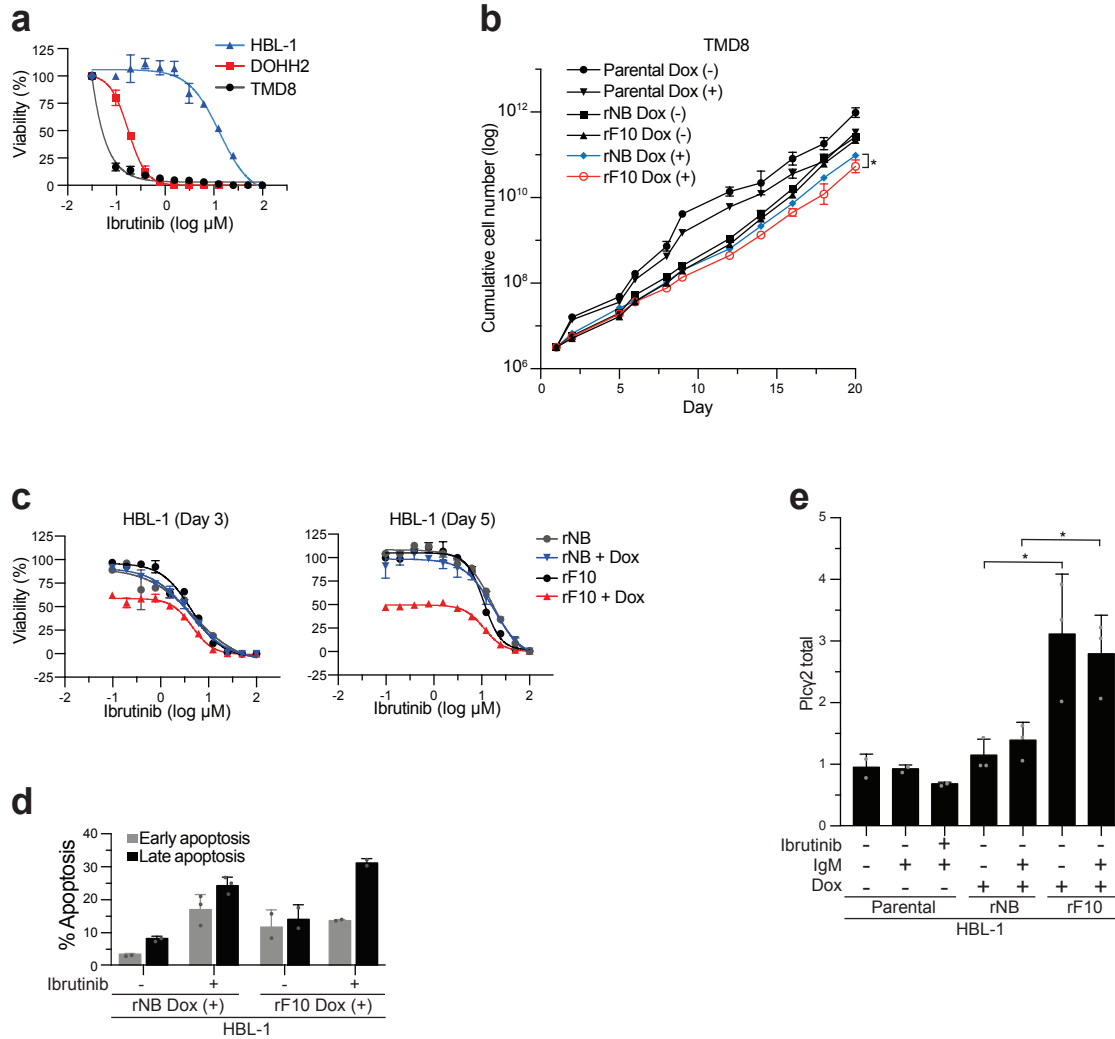

### Supplementary Figure 6, related to Figure 7. Effect of rF10 in DLBCL cell lines.

(a) Dose-response for ibrutinib in human DLBCL cell lines. Data points represent the mean  $\pm$  SD of a representative experiment done in duplicates ( $n=2$ ). Cellular IC<sub>50</sub> was obtained by non-linear regression curve fit analysis.

(b) TMD8 cell line was transduced with a doxycycline-inducible system for expression of reepodies, and cumulative cell number monitored upon treatment with  $2 \mu\text{g mL}^{-1}$  of doxycycline ( $n=3$ ). Parental cells are non-transduced cells.

(c) Viability of HBL-1 cells inducibly expressing rF10 and rNB control (+Dox) or non induced (-Dox) in the presence of ibrutinib was measured after 3 and 5 days using Cell Titer-Glo reagent. Data points represent the mean  $\pm$  SD of a representative experiment done in duplicate ( $n=2$ ). Cellular IC<sub>50</sub> was obtained by non-linear regression curve fit analysis.

(d) HBL-1 inducibly expressing rF10 or rNB control for 5 days in combination with ibrutinib ( $10 \mu\text{M}$  for 48 hours) were stained with 7AAD and Annexin V to analyze apoptosis by FACS. The quantification of early (7AAD-/Annexin V+) and late (7AAD+/Annexin V+) apoptotic cells were obtained from two replicates ( $n=2$ ).

(e) Quantification of total PLC $\gamma$ 2 level from HBL-1 inducibly expressing reepodies (flag-tagged) for 48 hours. BCR stimulation and ibrutinib treatment were performed as described in methods. Data shown are the mean  $\pm$  SD from two biological replicates ( $n=3$ ), and P-values were calculated using unpaired *t*-test. \* $P \leq 0.05$  ( $n=3$ ).

Source data are provided as a Source Data file.

# Supplementary Figure 7

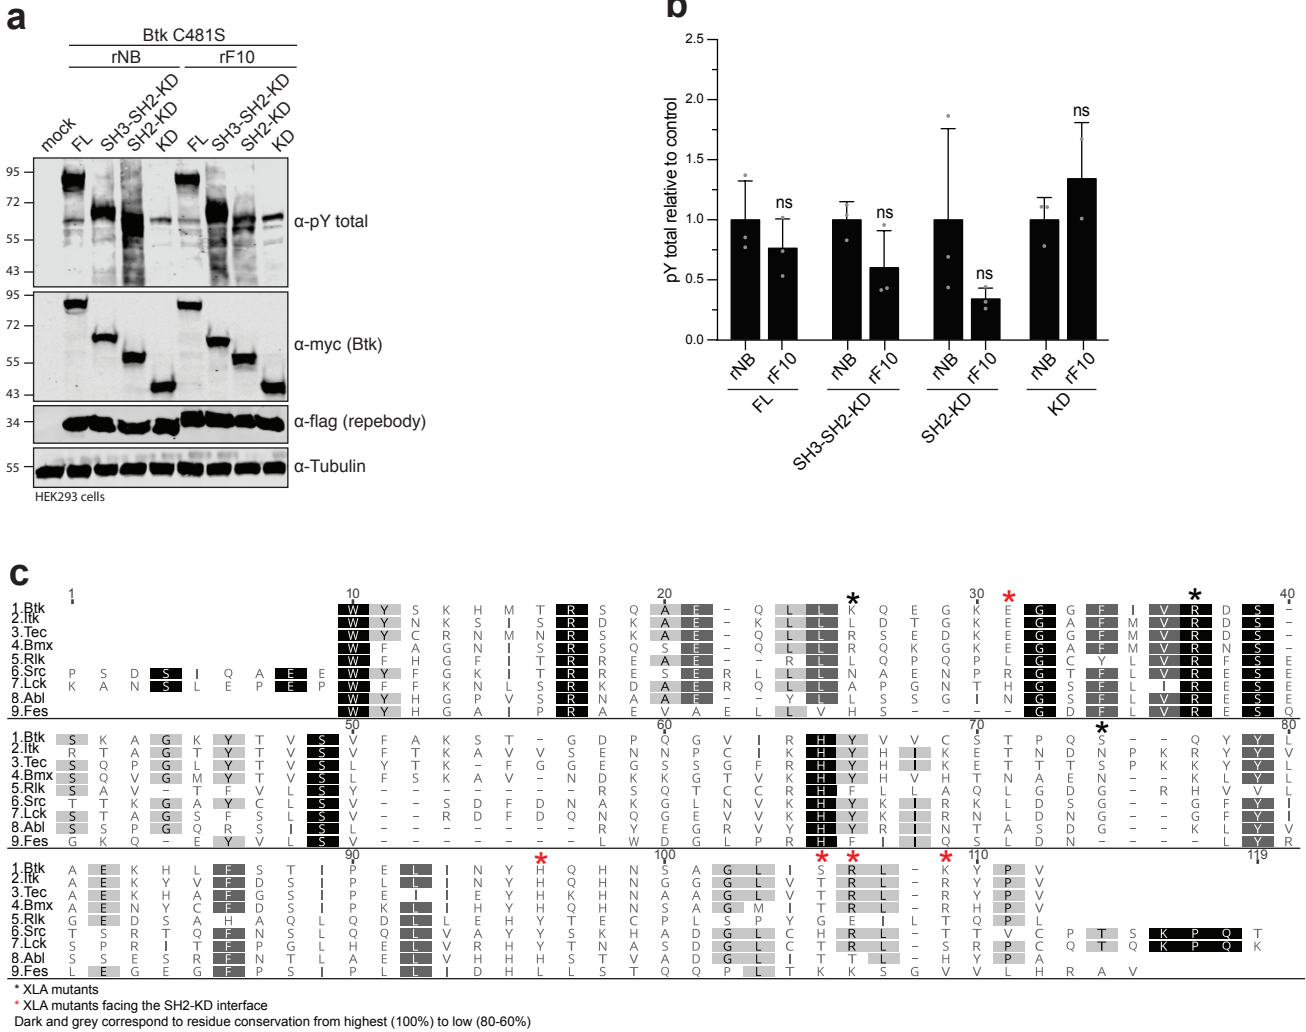

## Supplementary Figure 7, related to Figure 8 and Discussion. Targeting the Btk SH2-KD interface decreases activation of therapy-resistant Btk with mutation on C481.

(a,b) HEK293 cells were transiently co-transfected with indicated Btk-C481S constructs and repebodies. Immunoblot was used to assess total phosphotyrosine phosphorylation. Quantification of total phosphotyrosine normalized to total Btk (myc-Btk) expression level and relative to control repebody. Data shown are the mean  $\pm$  SD of two biological replicates (n=3).

(c) Sequence alignment of SH2 domains from human Btk and related kinases. Black squares represent residues highly conserved and grey squares show residues relatively conserved. Black asterisk symbol (\*) indicates residues mutated in XLA patients, while red asterisks are residues mutated in XLA patients and located in the predicted SH2-KD interface. Source data are provided as a Source Data file.



## SUPPLEMENTARY TABLES 1-5

Supplementary Table 1. *In vitro* autophosphorylation sites on the Btk SH2-KD protein.

| Site                | Peptide sequence                                            | Location      | Peptide count |
|---------------------|-------------------------------------------------------------|---------------|---------------|
| Y279                | SDSIEM $\underline{Y}$ EWYSK                                | SH2           | 56            |
| Y282                | SDSIEMYEW $\underline{Y}$ SK                                | SH2           | 56            |
| Y315                | AGKY $\underline{T}$ VSVFAK                                 | SH2           | 60            |
| Y334                | STGDPQGVIRHY $\underline{V}$ VCSTPQSQ $\underline{Y}$ YLAEK | SH2           | 46            |
| Y344                | STGDPQGVIRHY $\underline{V}$ VCSTPQSQ $\underline{Y}$ YLAEK | SH2           | 46            |
| Y345                | STGDPQGVIRHY $\underline{V}$ VCSTPQSQ $\underline{Y}$ YLAEK | SH2           | 46            |
| Y361                | HLFSTIPELIN $\underline{Y}$ HQHNSAGLISRLK                   | SH2           | 4             |
| Y375                | $\underline{Y}$ PVSQQNK                                     | SH2-KD linker | 3             |
| Y392                | NAPSTAGLG $\underline{Y}$ GSWEIDPK                          | SH2-KD linker | 10            |
| Y425                | WRGQ $\underline{Y}$ DVAIK                                  | KD            | 10            |
| Y461                | LVQL $\underline{Y}$ GVCTK                                  | KD            | 2             |
| Y511                | DVCEAME $\underline{Y}$ LESK                                | KD            | 4             |
| Y545                | VSDFGLSR $\underline{Y}$ VLDDEYTSSVGSK                      | KD            | 37            |
| Y551                | VSDFGLSR $\underline{Y}$ VLDDEYTSSVGSK                      | KD            | 37            |
| Y571                | FPVRWSPPEVLM $\underline{Y}$ SK                             | KD            | 15            |
| Y627                | V $\underline{Y}$ TIMYSCWHEK                                | KD            | 6             |
| Y631                | V $\underline{Y}$ TIM $\underline{Y}$ SCWHEK                | KD            | 6             |
| Total peptide count |                                                             |               | 444           |

Supplementary Table 2. SAXS parameters of human Btk wild-type and mutants.

| <b>Data collection parameters</b>                        |                                       |               |                   |                    |                     |                     |                     |
|----------------------------------------------------------|---------------------------------------|---------------|-------------------|--------------------|---------------------|---------------------|---------------------|
| Instrument                                               | MD29 beamline, ESRF Grenoble - France |               |                   |                    |                     |                     |                     |
| Wavelength (Å)                                           | 0.9919                                |               |                   |                    |                     |                     |                     |
| q-range (nm <sup>-1</sup> )                              | 0.03563 - 5                           |               |                   |                    |                     |                     |                     |
| Exposure time (sec)                                      | 5 (10 frames x 0.5 sec)               |               |                   |                    |                     |                     |                     |
| Temperature (K)                                          | 290                                   |               |                   |                    |                     |                     |                     |
| <b>Samples</b>                                           | <b>KD</b>                             | <b>SH2-KD</b> | <b>SH3-SH2-KD</b> | <b>Full-length</b> | <b>SH2-KD K296E</b> | <b>SH2-KD S371P</b> | <b>SH2-KD D521N</b> |
| Measurement mode                                         | batch                                 | SEC-SAXS      | batch             | batch              | SEC-SAXS            | SEC-SAXS            | batch               |
| Concentration range (mg.ml <sup>-1</sup> )               | 0.9 – 4.2                             | 100µ at 20.4  | 0.9 – 9.2         | 0.4 – 5.5          | 100µl at 30         | 100µl at 10.8       | 0.6 – 1.9           |
| SASBDB identifier                                        | SASDF53                               | SASDF63       | SASDF73           | SASDF83            | N/A                 | N/A                 | N/A                 |
| <b>Structural parameters</b>                             |                                       |               |                   |                    |                     |                     |                     |
| R <sub>g</sub> (nm) from Guinier                         | 2.09 ± 0.02                           | 2.832 ± 0.3   | 2.62 ± 0.15       | 4.04 ± 0.03        | 2.92 ± -0.04        | 2.64 ± 0.23         | 2.83 ± 0.07         |
| I(0)* (cm <sup>-1</sup> ) from Guinier                   | 24.86 ± 0.036                         | 85.5 ± 0.12   | 44.28 ± 0.056     | 60.24 ± 0.16       | 171.59 ± 0.15       | 8.66 ± 0.075        | 20.71 ± 0.044       |
| R <sub>g</sub> (nm) from P(r)                            | 2.096 ± 0.0003                        | 2.88 ± 0.0005 | 2.62 ± 0.0006     | 4.34 ± 0.0014      | 2.95 ± 0.0003       | 2.70 ± 0.03         | 2.9 ± 0.05          |
| D <sub>max</sub> (nm)                                    | 6.75 ± 0.67                           | 9.6 ± 0.95    | 8.3 ± 0.83        | 15.5 ± 1.2         | 10 ± 1.0            | 8.5 ± 0.86          | 10.3 ± 1.2          |
| Porod volume (nm <sup>3</sup> )                          | 52.4                                  | 65.9          | 72.44             | 114.07             | 66.47               | 62.53               | 60.82               |
| Dry volume calculated from sequence (nm <sup>3</sup> )** | 38.468                                | 55.077        | 63.126            | 92.784             | 55.059              | 55.89               | 55.076              |
| <b>Molecular mass determination (kDa)</b>                |                                       |               |                   |                    |                     |                     |                     |
| From Porod volume (V <sub>p</sub> /~1.6)                 | 24.9                                  | 47.6          | 40.9              | 76.1               | 48.5                | 39.1                | 42.7                |
| From SAXS MoW2***                                        | 28.9                                  | 49.7          | 35.7              | 65.2               | 50.9                | 44.6                | 46.4                |
| Bayesian inference                                       | 28.9                                  | 46.6          | 41.9              | 67.1               | 46.6                | 42.8                | 40.2                |
| From I(0) using V <sub>c</sub> invariant                 | 28.2                                  | 43.5          | 43.4              | 65.6               | 43.7                | 40.2                | 42.7                |
| Calculated from sequence****                             | 31.8                                  | 45.5          | 52.2              | 76.5               | 45.5                | 45.5                | 45.5                |
| Number of residues                                       | 274                                   | 396           | 452               | 664                | 396                 | 396                 | 396                 |
| <b>Software list</b>                                     |                                       |               |                   |                    |                     |                     |                     |
| Primary data reduction                                   | Automated pipeline at beamline        |               |                   |                    |                     |                     |                     |
| Data processing                                          | PRIMUS (ATSAS v.2.8.0)                |               |                   |                    |                     |                     |                     |
| Ab initio analysis                                       | DAMMIN and GASBOR                     |               |                   |                    |                     |                     |                     |
| Fitting                                                  | CRY SOL                               |               |                   |                    |                     |                     |                     |
| Model refinement                                         | SREFLEX                               |               |                   |                    |                     |                     |                     |
| Flexibility analysis                                     | EOM 2.0                               |               |                   |                    |                     |                     |                     |
| Model superimpositions                                   | SASpy plugin for Pymol                |               |                   |                    |                     |                     |                     |
| 3D graphics images                                       | Pymol (v.1.8.2.1)                     |               |                   |                    |                     |                     |                     |

\*I(0) values shown in SEC-SAXS measurements vary depending on protein concentration at the analyzed peak, and are therefore not normalized to protein concentration. The structural parameters analyzed are independent of this value (i.e., R<sub>g</sub>, D<sub>max</sub>, volumes).

\*\*<http://biotools.nubic.northwestern.edu/proteincalc.html>

\*\*\*SAXS MoW2

\*\*\*\*<http://web.expasy.org/>

Supplementary Table 3. X-ray data.

| Crystal structure                                   | 6HTF (rF10-SH2)      |
|-----------------------------------------------------|----------------------|
| <b>Data collection</b>                              |                      |
| Space group                                         | P 21 21 2            |
| Cell dimensions                                     |                      |
| <i>a, b, c</i> (Å)                                  | 145.53, 32.95, 80.63 |
| $\alpha, \beta, \gamma$ (°)                         | 90, 90, 90           |
| Resolution (Å)                                      | 50 (2.1) *           |
| <i>R</i> <sub>meas</sub>                            | 10.2 (81.1)          |
| <i>I</i> / $\sigma$ <i>I</i>                        | 12.99 (1.95)         |
| Completeness (%)                                    | 93.93 (84.43)        |
| Redundancy                                          | 3.89 (3.90)          |
| <b>Refinement</b>                                   |                      |
| Resolution (Å)                                      | 2.1                  |
| No. reflections                                     | 22064                |
| <i>R</i> <sub>work</sub> / <i>R</i> <sub>free</sub> | 0.213 / 0.252        |
| No. atoms                                           | 3041                 |
| Protein                                             | 2915                 |
| Ligand/ion                                          | 0                    |
| Water                                               | 126                  |
| Protein residues                                    | 362                  |
| <b>B-factors</b>                                    |                      |
| Protein                                             | 40.75                |
| Ligand/ion                                          | N/A                  |
| Water                                               | 36.85                |
| <b>R.m.s. deviations</b>                            |                      |
| Bond lengths (Å)                                    | 0.023                |
| Bond angles (°)                                     | 1.44                 |
| <b>Ramachandran analysis</b>                        |                      |
| Favored regions                                     | 95.53%               |
| Allowed regions                                     | 4.47%                |
| Outliers                                            | 0                    |

\*Values in parentheses are for the highest-resolution shell.

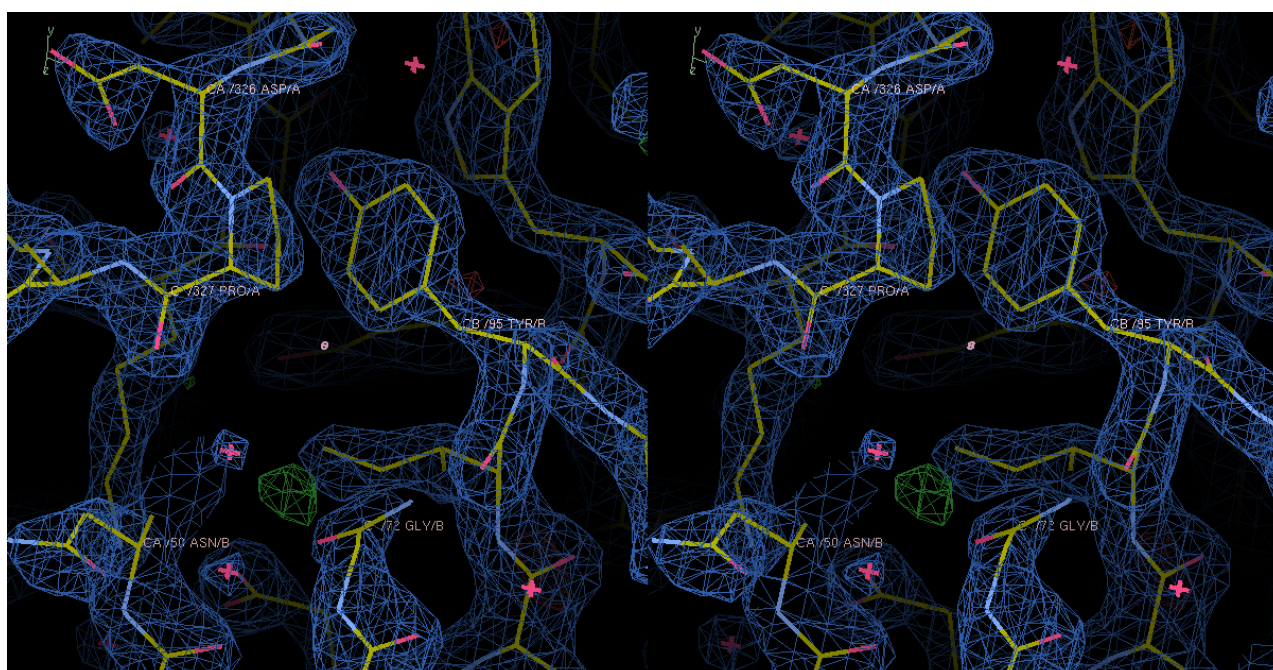

Supplementary Table 4. SAXS parameters of Btk-rF10 complexes.

| <b>Data collection parameters</b>                        |                                       |                 |                    |                        |                         |
|----------------------------------------------------------|---------------------------------------|-----------------|--------------------|------------------------|-------------------------|
| Instrument                                               | MD29 beamline, ESRF Grenoble - France |                 |                    |                        |                         |
| Wavelength (Å)                                           | 0.9919                                |                 |                    |                        |                         |
| q-range (nm <sup>-1</sup> )                              | 0.03563 - 5                           |                 |                    |                        |                         |
| Exposure time (sec)                                      | 5 (10 frames x 0.5 sec)               |                 |                    |                        |                         |
| Temperature (K)                                          | 290                                   |                 |                    |                        |                         |
| <b>Samples</b>                                           | <b>rF10</b>                           | <b>SH2-rF10</b> | <b>SH2-KD-rF10</b> | <b>SH3-SH2-KD-rF10</b> | <b>Full-length-rF10</b> |
| Measurement mode                                         | SEC-SAXS                              | batch           | SEC-SAXS           | batch                  | batch                   |
| Concentration range (mg.ml <sup>-1</sup> )               | 100 µl at 14                          | 0.6 – 2.7       | 100µl at 20        | 0.4 – 3.6              | 0.4 – 2.9               |
| SASBDB identifier                                        | N/A                                   | N/A             | N/A                | N/A                    | N/A                     |
| <b>Structural parameters</b>                             |                                       |                 |                    |                        |                         |
| R <sub>g</sub> (nm) from Guinier                         | 2.42 ± 0.2                            | 2.6 ± 0.3       | 3.46 ± 0.12        | 3.55 ± 0.26            | 4.48 ± 0.38             |
| I(0)* (cm <sup>-1</sup> ) from Guinier                   | 37.12 ± 0.06                          | 35.7 ± 0.18     | 87.82 ± 0.24       | 61.09 ± 0.19           | 79.46 ± 0.23            |
| R <sub>g</sub> (nm) from P(r)                            | 2.47 ± 0.006                          | 2.6 ± 0.01      | 3.52 ± 0.007       | 3.6 ± 0.01             | 4.69 ± 0.02             |
| D <sub>max</sub> (nm)                                    | 7.9 ± 0.8                             | 8.2 ± 0.8       | 11.5 ± 1.2         | 12.5 ± 1.2             | 16.9 ± 1.7              |
| Porod volume (nm <sup>3</sup> )                          | 50.85                                 | 67.4            | 100.6              | 116.46                 | 156.04                  |
| Dry volume calculated from sequence (nm <sup>3</sup> )** | 37.581                                | 53.569          | 92.638             | 100.685                | 130.345                 |
| <b>Molecular mass determination (kDa)</b>                |                                       |                 |                    |                        |                         |
| From Porod volume (V <sub>p</sub> /~1.6)                 | 24.8                                  | 37.9            | 70.4               | 81.2                   | 100.8                   |
| From SAXS MoW2***                                        | 27.1                                  | 41.9            | 79.5               | 86.2                   | 116.2                   |
| Bayesian inference                                       | 28.2                                  | 37.7            | 67.1               | 74.3                   | 94.2                    |
| From I(0) using V <sub>c</sub> invariant                 | 27.6                                  | 39.3            | 63.5               | 74.6                   | 89.4                    |
| Calculated from sequence****                             | 31.1                                  | 44.3            | 76.6               | 83.2                   | 107.7                   |
| Number of residues                                       | 274                                   | 391             | 670                | 726                    | 938                     |
| <b>Software list</b>                                     |                                       |                 |                    |                        |                         |
| Primary data reduction                                   | Automated pipeline at beamline        |                 |                    |                        |                         |
| Data processing                                          | PRIMUS (ATSAS v.2.8.0)                |                 |                    |                        |                         |
| Ab initio analysis                                       | DAMMIN and GASBOR                     |                 |                    |                        |                         |
| Fitting                                                  | CRY SOL                               |                 |                    |                        |                         |
| Model refinement                                         | SREFLEX                               |                 |                    |                        |                         |
| Flexibility analysis                                     | EOM 2.0                               |                 |                    |                        |                         |
| Model superimpositions                                   | SASpy plugin for Pymol                |                 |                    |                        |                         |
| 3D graphics images                                       | Pymol (v.1.8.2.1)                     |                 |                    |                        |                         |

\*I(0) values shown in SEC-SAXS measurements vary depending on protein concentration at the analyzed peak, and are therefore not normalized to protein concentration. The structural parameters analyzed are independent of this value (i.e., R<sub>g</sub>, D<sub>max</sub>, volumes).

\*\*<http://biotools.nubic.northwestern.edu/proteincalc.html>

\*\*\*SAXS MoW2

\*\*\*\*<http://web.expasy.org/>

Supplementary Table 5. Oligonucleotides used for site-directed mutagenesis.

| Primer name | Sequence 5' to 3' (forward and reverse)                                                       |
|-------------|-----------------------------------------------------------------------------------------------|
| Btk K296E   | For: GCTGAGCAACTGCTAGAGCAAGAGGGGAAAG<br>Rev: CTTCCCTCTTGCTCTAGCAGTTGCTCAGC                    |
| Btk Y223F   | For: GTGGCCCTTTTCGATTACATGCCAATG<br>Rev: CATTGGCATGTAATCGAAAAGGGCCAC                          |
| Btk E301K   | For: GCAAGAGGGGAAAAAGGGAGGTTTCATTGTC<br>Rev: GACAATGAAACCTCCCTTTTCCCTCTTGC                    |
| Btk R307G   | For: GGTTTCATTGTGCGGCGACTCCAGCAAAGC<br>Rev: GCTTTGCTGGAGTCGCCGACAATGAAACC                     |
| Btk K311E   | For: CAGAGACTCCAGCGAGGCTGGCAAATATACAG<br>Rev: CTGTATATTTGCCAGCCTCGCTGGAGTCTCTG                |
| Btk Q341A   | For: GTTGTGTGTTCCACACCTGCGAGCCAGTATTACCTGGC<br>Rev: GCCAGGTAATACTGGCTCGCAGGTGTGGAACACACAAC    |
| Btk H364D   | For: CATTAACTACCATCAGGACAACCTGCGAGGACTC<br>Rev: GAGTCCTGCAGAGTTGTCTGATGGTAGTTAATG             |
| Btk S371P   | For: CTGCAGGACTCATACCCAGGCTCAAATATCCAG<br>Rev: CTGGATATTTGAGCCTGGGTATGAGTCCTGCAG              |
| Btk R372G   | For: CTCTGCAGGACTCATATCCGGCCTCAAATATCCAG<br>Rev: CTGGATATTTGAGGCCGGATATGAGTCCTGCAGAG          |
| Btk K374N   | For: CTCTGCAGGACTCATATCCAGGCTCAACTATCCAG<br>Rev: CTGGATAGTTGAGCCTGGATATGAGTCCTGCAGAG          |
| Btk K400E   | For: AGGTCAGGTCCTCTGGATCAATTTCCCATGATCCGT<br>Rev: ACGGATCATGGGAAATTGATCCAGAGGACCTGACCT        |
| Btk T403K   | For: CCCAGCTCCTTCAAGAACTTCAGGTCCTTTGGATCAA<br>Rev: TTGATCCAAAGGACCTGAAGTTCTTGAAGGAGCTGGGG     |
| Btk L405E   | For: CAGTCCCCAGCTCCTTCTCGAAGGTCAGGTCCTTTG<br>Rev: CAAAGGACCTGACCTTCGAGAAGGAGCTGGGGACTG        |
| Btk I429E   | For: GCCTTCTTTGATCATCTTCTCGGCCACGTCGTA CTGGCC<br>Rev: GGCCAGTACGACGTGGCCGAGAAGATGATCAAAGAAGGC |
| Btk C481S   | For: GGTAGTTCAGGAGGCTGCCATTGGCCATGTA<br>Rev: TACATGGCCAATGGCAGCCTCCTGAACTACC                  |
| Btk D521N   | For: GTTCCTTACC GAAACCTGGCAGCTCG<br>Rev: CGAGCTGCCAGGTTTCGGTGAAGGAAC                          |
| Btk Y551F   | For: GGATGATGAATTCACAAGCTCAGTAG<br>Rev: CTA CTGAGCTTGTGAATTCATCATCC                           |
