# Supplementary material for: Btk SH2-kinase interface is critical for allosteric kinase activation and its targeting inhibits B-cell neoplasms
Source: PubMed Central journal article supplement (PMC7210950; doi:10.1038/s41467-020-16128-5), 2020-05-08
Supplement: 41467_2020_16128_MOESM3_ESM.pdf [file 41467_2020_16128_MOESM3_ESM.pdf]

## Reporting Summary

Nature Research wishes to improve the reproducibility of the work that we publish. This form provides structure for consistency and transparency in reporting. For further information on Nature Research policies, see [Authors & Referees](#) and the [Editorial Policy Checklist](#).

### Statistics

For all statistical analyses, confirm that the following items are present in the figure legend, table legend, main text, or Methods section.

n/a Confirmed

- The exact sample size ( $n$ ) for each experimental group/condition, given as a discrete number and unit of measurement
- A statement on whether measurements were taken from distinct samples or whether the same sample was measured repeatedly
- The statistical test(s) used AND whether they are one- or two-sided  
*Only common tests should be described solely by name; describe more complex techniques in the Methods section.*
- A description of all covariates tested
- A description of any assumptions or corrections, such as tests of normality and adjustment for multiple comparisons
- A full description of the statistical parameters including central tendency (e.g. means) or other basic estimates (e.g. regression coefficient) AND variation (e.g. standard deviation) or associated estimates of uncertainty (e.g. confidence intervals)
- For null hypothesis testing, the test statistic (e.g.  $F$ ,  $t$ ,  $r$ ) with confidence intervals, effect sizes, degrees of freedom and  $P$  value noted  
*Give  $P$  values as exact values whenever suitable.*
- For Bayesian analysis, information on the choice of priors and Markov chain Monte Carlo settings
- For hierarchical and complex designs, identification of the appropriate level for tests and full reporting of outcomes
- Estimates of effect sizes (e.g. Cohen's  $d$ , Pearson's  $r$ ), indicating how they were calculated

*Our web collection on [statistics for biologists](#) contains articles on many of the points above.*

### Software and code

Policy information about [availability of computer code](#)

Data collection

Diffraction data was processed and scaled with the XDS package. Acquired SAXS data were averaged and subtracted from an appropriate solvent-blank to produce the final curve using the in-line synchrotron software and ATSAS Suite (EMBL) PRIMUS and CHROMIXS.

Data analysis

Crystallography software: molecular replacement, manual model building, B-factor refinement, solvent addition, energy-minimization and refinement of structures were performed with Phaser and Coot (Phenix version 1.13).  
Molecular graphics: PyMOL 2.0.4 (DeLano Scientific).  
SAXS software: PRIMUS, GNOM and CHROMIXS (final scattering curves); DAMMIF and SREFLEX (ab initio models), EOM 2.0 (flexibility of multidomain complexes), CRY SOL (fitting of models to experimental data), SASpy (superimpositions).

For manuscripts utilizing custom algorithms or software that are central to the research but not yet described in published literature, software must be made available to editors/reviewers. We strongly encourage code deposition in a community repository (e.g. GitHub). See the Nature Research [guidelines for submitting code & software](#) for further information.

### Data

Policy information about [availability of data](#)

All manuscripts must include a [data availability statement](#). This statement should provide the following information, where applicable:

- Accession codes, unique identifiers, or web links for publicly available datasets
- A list of figures that have associated raw data
- A description of any restrictions on data availability

The X-ray structure of the rF10-SH2 complex was deposited at Protein Data Bank (entry 6HTF). Full SAXS curves and analyzed data for wild-type Btk proteins were deposited at SASBDB (entries SASDF53, SASDF63, SASDF73, and SASDF83).

## Field-specific reporting

Please select the one below that is the best fit for your research. If you are not sure, read the appropriate sections before making your selection.

- Life sciences     Behavioural & social sciences     Ecological, evolutionary & environmental sciences

For a reference copy of the document with all sections, see [nature.com/documents/nr-reporting-summary-flat.pdf](https://www.nature.com/documents/nr-reporting-summary-flat.pdf)

## Life sciences study design

All studies must disclose on these points even when the disclosure is negative.

|                 |                                                                                                           |
|-----------------|-----------------------------------------------------------------------------------------------------------|
| Sample size     | No sample size calculation was applied in this study. Experiments were performed in 3 biological repeats. |
| Data exclusions | No data was excluded.                                                                                     |
| Replication     | All experiments were independently replicated as stated in the figure legends.                            |
| Randomization   | NA                                                                                                        |
| Blinding        | No blinding, as the same investigator performed most experiments and analyzed the data.                   |

## Reporting for specific materials, systems and methods

We require information from authors about some types of materials, experimental systems and methods used in many studies. Here, indicate whether each material, system or method listed is relevant to your study. If you are not sure if a list item applies to your research, read the appropriate section before selecting a response.

### Materials & experimental systems

- |                                     |                                                           |
|-------------------------------------|-----------------------------------------------------------|
| n/a                                 | Involved in the study                                     |
| <input type="checkbox"/>            | <input checked="" type="checkbox"/> Antibodies            |
| <input type="checkbox"/>            | <input checked="" type="checkbox"/> Eukaryotic cell lines |
| <input checked="" type="checkbox"/> | <input type="checkbox"/> Palaeontology                    |
| <input checked="" type="checkbox"/> | <input type="checkbox"/> Animals and other organisms      |
| <input checked="" type="checkbox"/> | <input type="checkbox"/> Human research participants      |
| <input checked="" type="checkbox"/> | <input type="checkbox"/> Clinical data                    |

### Methods

- |                                     |                                                    |
|-------------------------------------|----------------------------------------------------|
| n/a                                 | Involved in the study                              |
| <input checked="" type="checkbox"/> | <input type="checkbox"/> ChIP-seq                  |
| <input type="checkbox"/>            | <input checked="" type="checkbox"/> Flow cytometry |
| <input checked="" type="checkbox"/> | <input type="checkbox"/> MRI-based neuroimaging    |

## Antibodies

### Antibodies used

#### Immunoblotting:

Mouse monoclonal anti-Total pY (clone 4G10), dilution 1:1000, Millipore, Cat# 05-321; RRID: AB\_309678  
 Mouse monoclonal anti-Btk (D6T2C), dilution 1:1000, Cell Signaling, Cat# 56044; RRID: AB\_2799503  
 Rabbit polyclonal anti-Btk, dilution 1:1000, Thermo Scientific, Cat# PA5-27392; RRID: AB\_2544868  
 Mouse monoclonal anti-Btk (pY551)/Itk (pY511) Clone 24a, dilution 1:1000, BD Biosciences, Cat# 558034; RRID: AB\_2067823  
 Rabbit polyclonal anti-Btk (pY223), dilution 1:1000, Cell Signaling, Cat# 5082; RRID: AB\_10561017  
 Rabbit polyclonal anti-p44/42 MAPK (Erk1/2), dilution 1:1000, Cell Signaling, Cat# 9102; RRID: AB\_330744  
 Mouse monoclonal anti-phospho-p44/42 MAPK (Erk1/2) (Thr202/Tyr204) (E10), dilution 1:1000, Cell Signaling, Cat# 9106; RRID: AB\_331768  
 Rabbit polyclonal anti-PLC $\gamma$ 2, dilution 1:1000, Cell Signaling, Cat# 3872; RRID: AB\_2299586  
 Rabbit polyclonal anti-PLC $\gamma$ 2 (Tyr1217), dilution 1:1000, Cell Signaling, Cat# 3871; RRID: AB\_2299548  
 Mouse monoclonal anti-Flag, Sigma, dilution 1:5000, Cat# F3165; RRID: AB\_259529  
 Mouse monoclonal anti-Penta-his, dilution 1:5000, Qiagen, Cat# 34660; RRID: AB\_2619735  
 Rabbit polyclonal anti-PLC $\gamma$ 2 (Tyr753) [EPR5914-3], dilution 1:1000, Abcam, Cat# ab133455; RRID: AB\_2163712  
 Mouse monoclonal anti-Tubulin, dilution 1:2000, Sigma, Cat# T9026; RRID: AB\_477593  
 Mouse monoclonal anti-Myc-tag Myc.A7 DyLight800, dilution 1:10,000, Thermo Scientific, Cat# MA1-21316-D800; RRID: AB\_2536996  
 Goat polyclonal anti-mouse IgG IRDye 800CW, dilution 1:10,000, LiCor, Cat# 926-32210; RRID: AB\_621842  
 Donkey polyclonal anti-Rabbit IgG (H+L) IRDye800, dilution 1:10,000, Rockland, Cat# 611-732-127; RRID: AB\_220158  
 Goat polyclonal anti-Mouse IgG (H+L) Peroxidase AffiniPure, dilution 1:10,000, Jackson ImmunoResearch, Cat# 115-035-003; RRID: AB\_10015289  
 Goat polyclonal anti-Rabbit IgG (H+L) Peroxidase AffiniPure, dilution 1:10,000, Jackson ImmunoResearch, Cat# 111-035-003; RRID: AB\_2313567

## Eukaryotic cell lines

Policy information about [cell lines](#)

Cell line source(s)

HEK293, ATCC, Cat# CRL-1573; RRID: CVCL\_0045  
 HEK293T, ATCC, Cat# CRL-3216; RRID: CVCL\_0063  
 Sf9 insect cells, Thermo Scientific, Cat# 11496-015  
 HBL-1, Gift from M. Thome-Miazza, RRID: CVCL\_4213  
 DOHH2, Gift from M. Thome-Miazza, Cat# ACC-47; RRID: CVCL\_1179  
 TMD8, Gift from M. Thome-Miazza, RRID: CVCL\_A442

Authentication

Cell lines from ATCC and Thermo Scientific were authenticated by the vendors.

Mycoplasma contamination

Cell lines were regularly tested and were mycoplasma negative

Commonly misidentified lines  
 (See [ICLAC](#) register)

NA

## Flow Cytometry

### Plots

Confirm that:

- The axis labels state the marker and fluorochrome used (e.g. CD4-FITC).
- The axis scales are clearly visible. Include numbers along axes only for bottom left plot of group (a 'group' is an analysis of identical markers).
- All plots are contour plots with outliers or pseudocolor plots.
- A numerical value for number of cells or percentage (with statistics) is provided.

### Methodology

Sample preparation

HBL-1 cells were seeded at density of  $5 \times 10^5$  cells/well in 3 mL of cell media in 6-well cell culture plates. Cell treatments are described in Methods section. Briefly, cells were washed twice with cold PBS and resuspended in Annexin V binding buffer containing Cy5-Annexin V and 7AAD. Cells were gently dissociated, filtered through a 35  $\mu$ m nylon mesh and kept on ice until FACS measurement.

Instrument

Beckman Coulter Gallios.

Software

Kaluza v1.0 for data collection and FlowJo v10.6 for data analysis.

Cell population abundance

Data from  $10 \times 10^4$  gated events were collected for each sample.

Gating strategy

Intact cells were initially gated in a SSC/FSC area plot. Cell debris and doublets were excluded from the analysis. Unstained cells, single staining with Cy5-Annexin V or 7AAD, and double stained Annexin V/7AAD cells were used as controls for accurate gating, compensation and quadrants.

- Tick this box to confirm that a figure exemplifying the gating strategy is provided in the Supplementary Information.
